# Supplementary material for: The casein-derived peptide YFYPEL alleviates intestinal epithelial cell dysfunction associated with NEC by regulating the PI3K/AKT signaling pathway
Source: Royal Society of Chemistry journal article supplement (doi:10.1039/d2fo02400d), 2023-01-01
Supplement: d2fo02400d1.pdf [file d2fo02400d1.pdf]

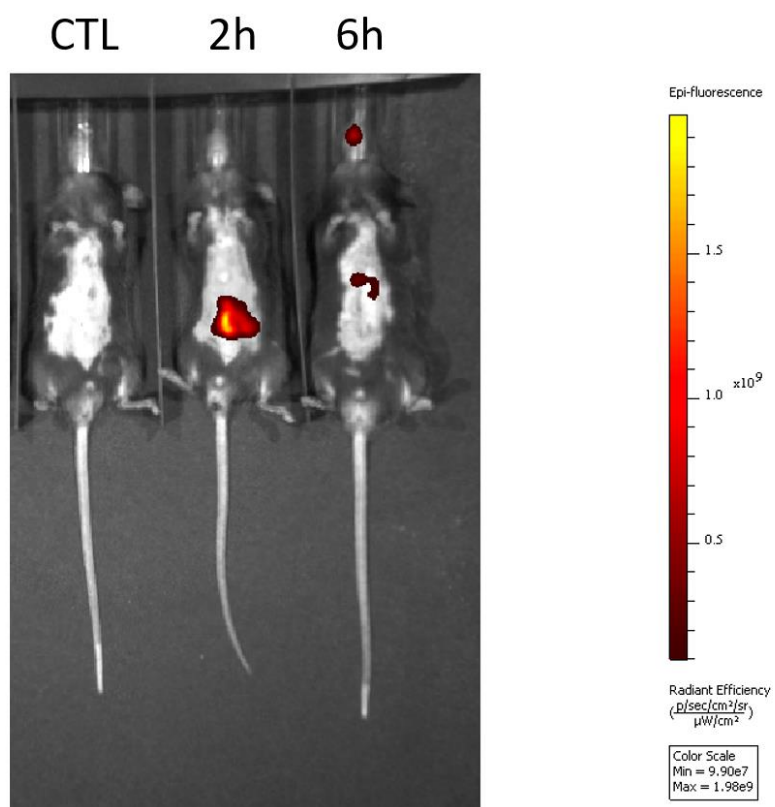

**Supplementary figure 1.** Fluorescence imaging of mouse model at 2 h and 6 h post-administration of FITC-labeled YFYPEL.

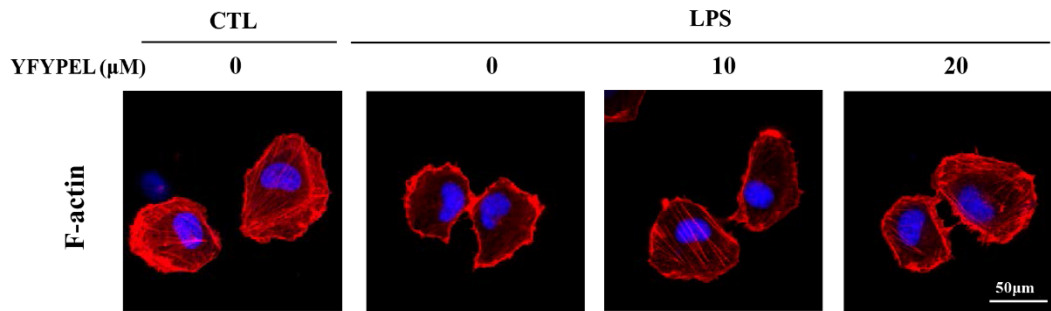

**Supplementary figure 2.** F-actin was evaluated by confocal microscope from four groups.

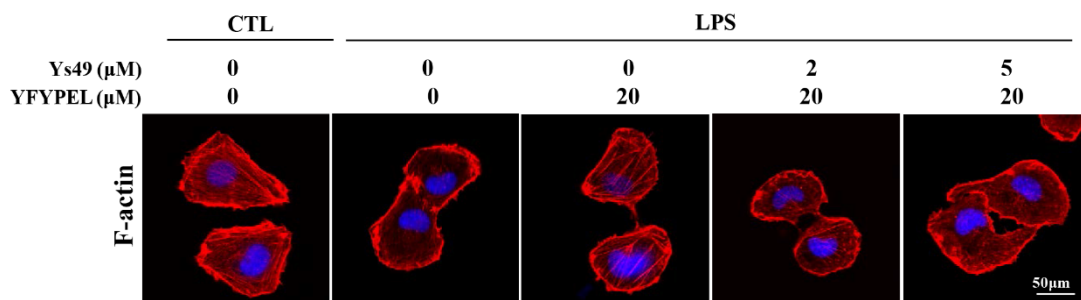

**Supplementary figure 3.** F-actin was evaluated by confocal microscope from five groups.
